# Supplementary material
Source: publisher site journal article supplement (https://www.spandidos-publications.com/8549/downloadSupplementary)

Figure S1. GLP characterization and identification. (A) GLP infrared spectrum. (B) GLP monosaccharide component identification. GLP, *Ganoderma lucidum* polysaccharides; nC, nanocoulomb.

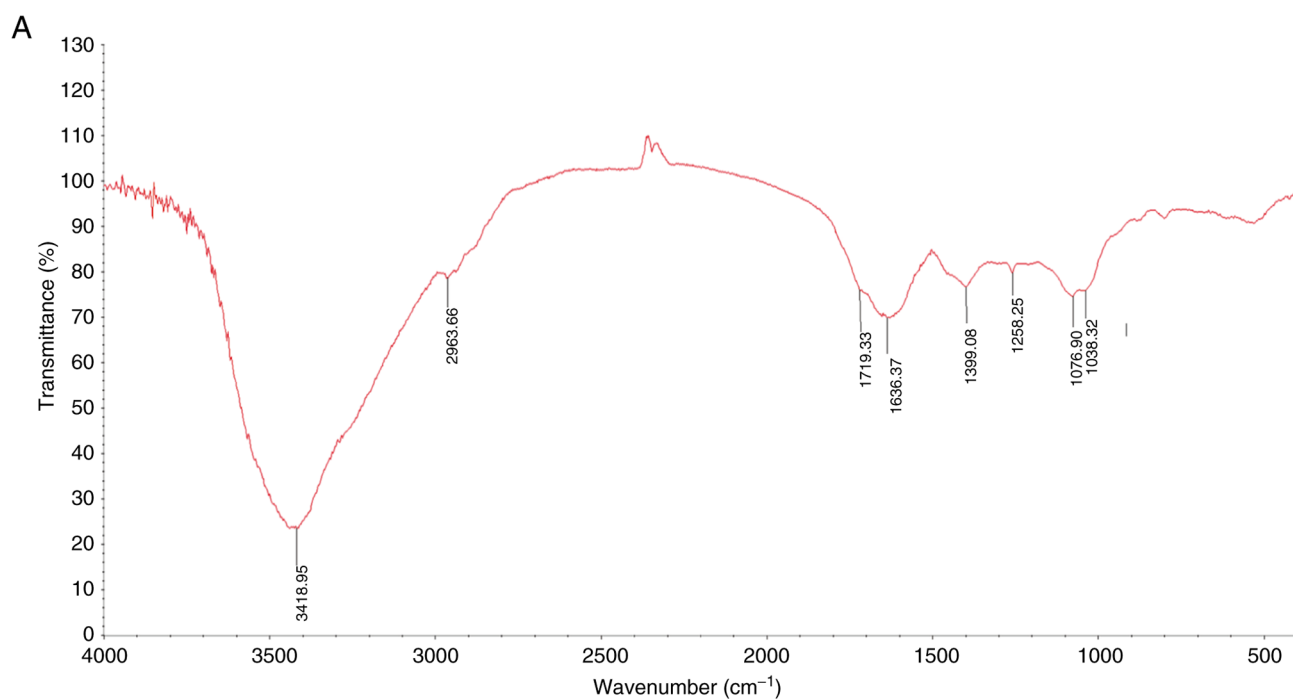

**B**

| Component                | Peak area (nC*min) | Retention time (min) | Molar ratio | Content (μg/mg) |
|--------------------------|--------------------|----------------------|-------------|-----------------|
| <u>Fucose</u>            | 0.436              | 5.192                | 0.009       | 1.920           |
| <u>Galactosamine</u>     | 0.000              | 10.175               | 0.000       | 0.000           |
| <u>Rhamnose</u>          | 0.000              | 10.684               | 0.000       | 0.000           |
| <u>Arabinose</u>         | 0.223              | 11.867               | 0.006       | 1.173           |
| <u>Glucosamine</u>       | 2.958              | 13.259               | 0.024       | 6.684           |
| <u>Galactose</u>         | 3.380              | 15.417               | 0.118       | 28.113          |
| <u>Glucose</u>           | 26.618             | 17.592               | 0.746       | 177.311         |
| <u>Xylose</u>            | 0.482              | 20.784               | 0.015       | 2.875           |
| <u>Mannose</u>           | 1.270              | 22.042               | 0.037       | 8.772           |
| <u>Fructose</u>          | 0.000              | 25.125               | 0.000       | 0.000           |
| <u>Ribose</u>            | 0.000              | 27.317               | 0.000       | 0.000           |
| <u>Galacturonic Acid</u> | 0.453              | 43.009               | 0.032       | 8.318           |
| <u>Guluronic Acid</u>    | 0.000              | 43.7                 | 0.000       | 0.000           |
| <u>Glucuronic Acid</u>   | 0.458              | 45.484               | 0.014       | 3.529           |
| <u>Mannuronic Acid</u>   | 0.000              | 47.892               | 0.000       | 0.000           |

Figure S2. Effects of GLP on the body weight gain, food intake and fat and muscle content. (A) Body weight gain. (B) Food intake. (C) Lean, (D) fat and (E) liquid mass (n≥6). ##P<0.01, ###P<0.005 vs. Sham; \*P<0.05, \*\*P<0.01, \*\*\*P<0.001 vs. OVX. GLP, *Ganoderma lucidum* polysaccharides; OVX, ovariectomy; LGLP, low-dose GLP; MGLP, medium-dose GLP; HGLP, high-dose GLP; Siv, simvastatin.

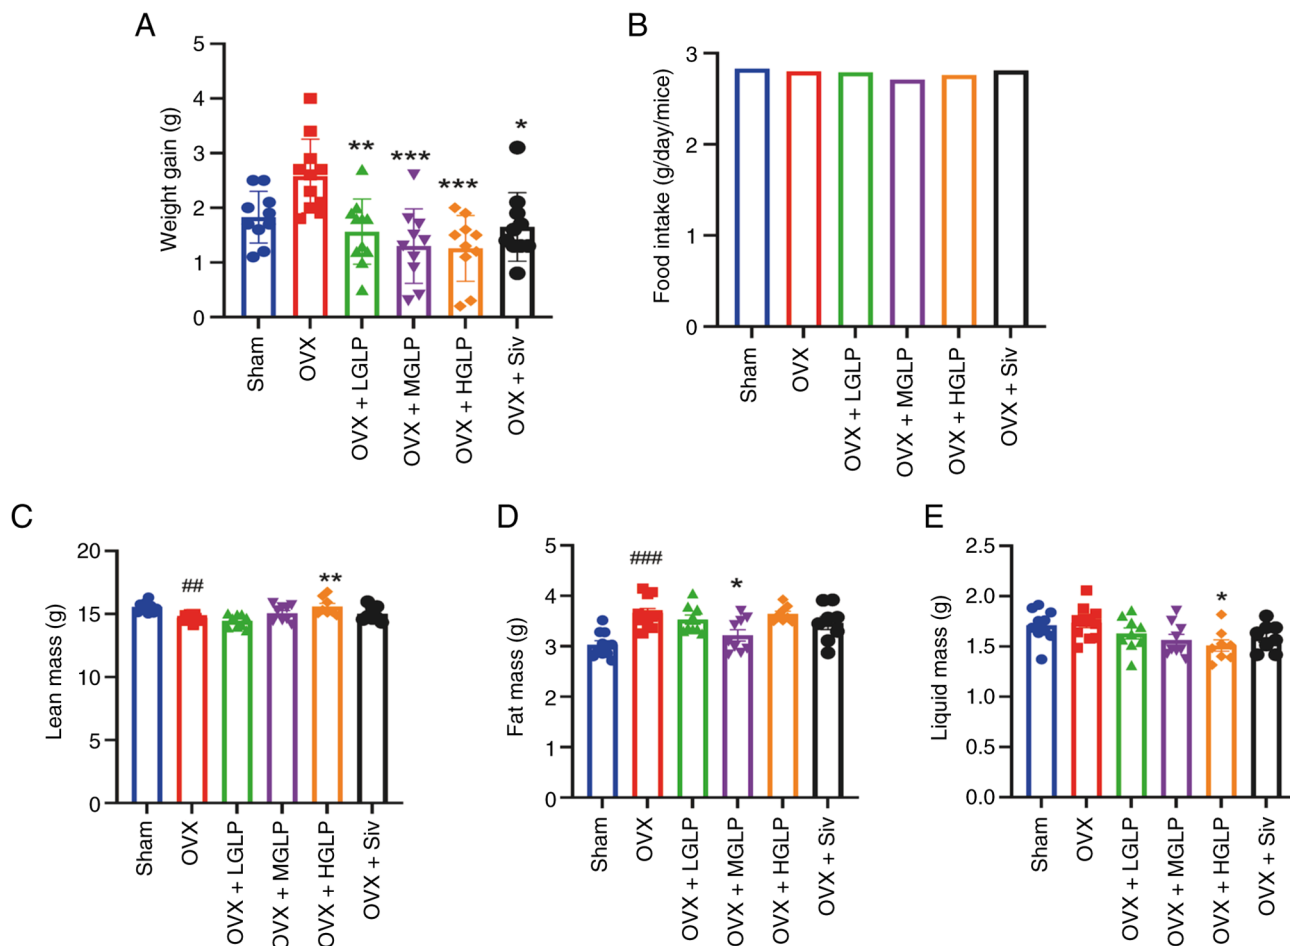

Figure S3. Effect of GLP on the expression of cholesterol synthesis-associated proteins in the hepatic tissue. (A) Protein levels detected by western blot and (B) densitometry (n≥6). #P<0.05 vs. Sham; \*P<0.05, \*\*P<0.01, \*\*\*P<0.001 vs. OVX. GLP, *Ganoderma lucidum* polysaccharides; OVX, ovariectomy; LGLP, low-dose GLP; MGLP, medium-dose GLP; HGLP, high-dose GLP; Siv, simvastatin; HMGCR, 3-hydroxy-3-methylglutaryl-CoA reductase; MVK, mevalonate kinase; IDI1, isopentenyl-diphosphate delta isomerase 1.

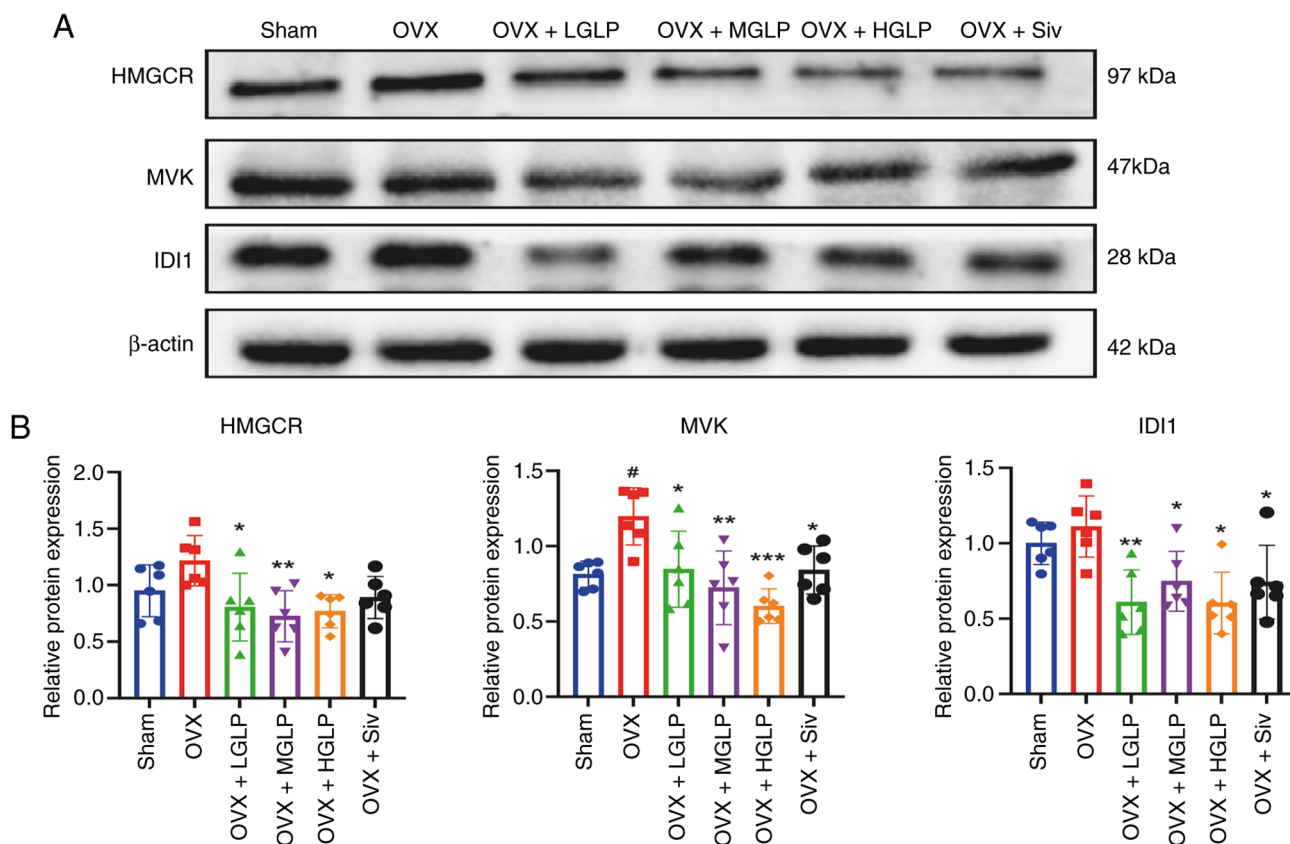

Figure S4. Effect of GLP on the expression of circadian rhythm proteins in hepatic tissue. (A) Protein expression levels of (B) CLOCK and BMAL1 in the liver (n≥6). #P<0.05 vs. Sham; \*P<0.05 vs. OVX. GLP, *Ganoderma lucidum* polysaccharides; OVX, ovariectomy; LGLP, low-dose GLP; MGLP, medium-dose GLP; HGLP, high-dose GLP; Siv, simvastatin; CLOCK, clock circadian regulator; BMAL1, aryl hydrocarbon receptor nuclear translocator like 1.

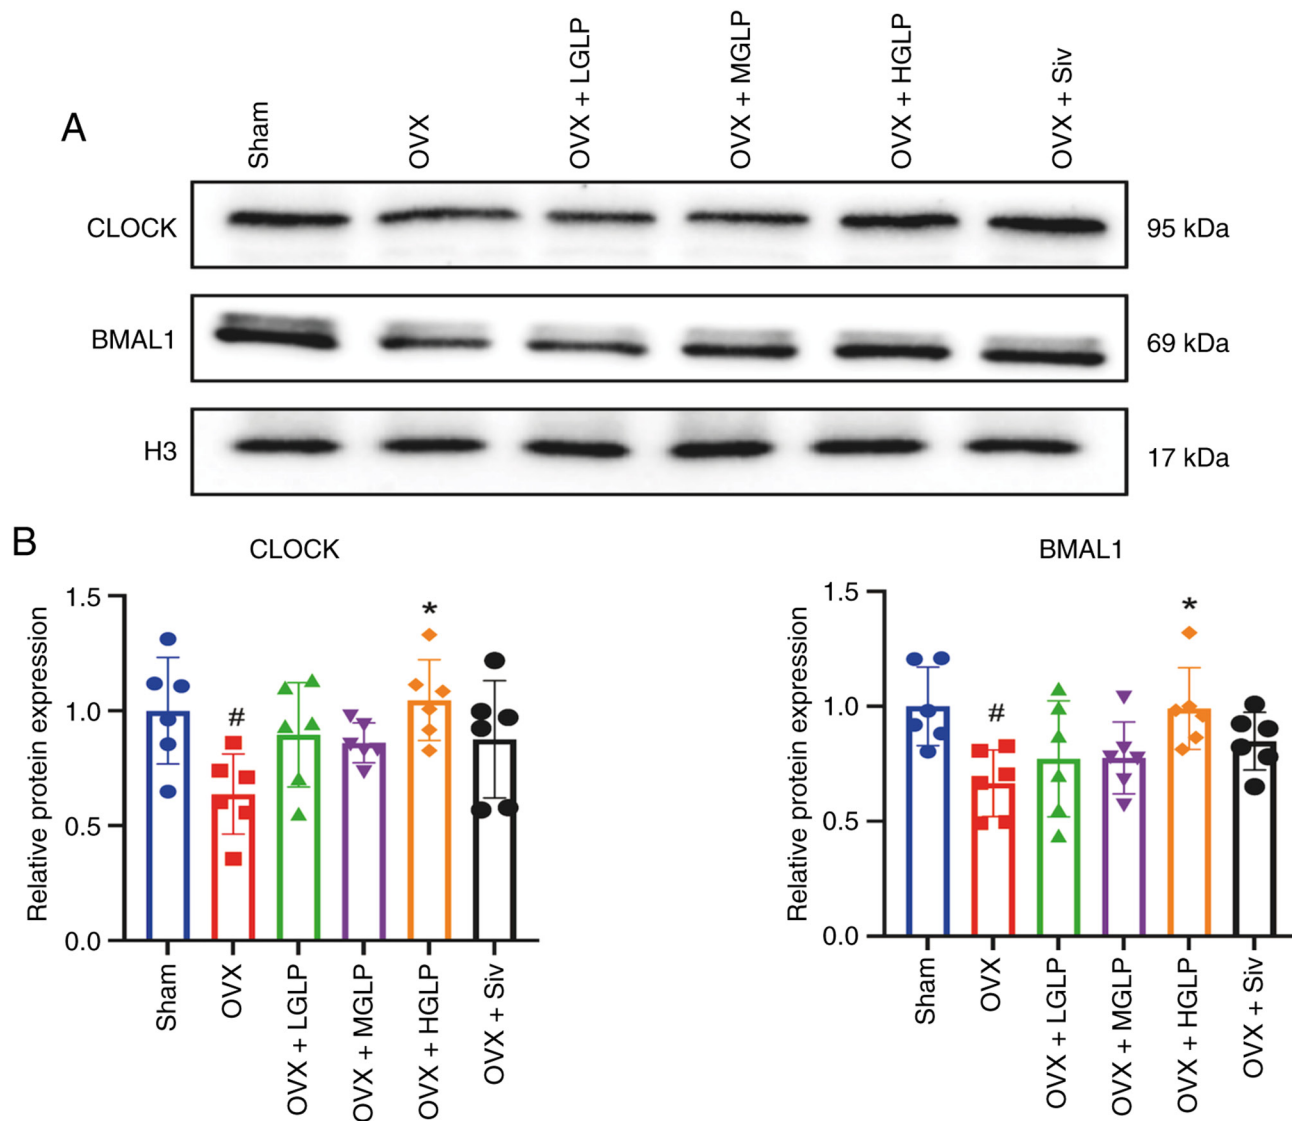

Figure S5. Effect of GLP on estrogen receptor and downstream gene expression in the liver. mRNA expression levels of *Esr1*, *Esr2*, *Crat*, *Cyp27a1*, *Fads2*, *Hnf1a*, *Acs15*, *Acly*, *Cpt1a*, *Apoa2*, *Abcg8* and *Gpam* in the liver (n≥6). \*P<0.05, \*\*P<0.01, \*\*\*P<0.001 vs. OVX. GLP, *Ganoderma lucidum* polysaccharides; OVX, ovariectomy; LGLP, low-dose GLP; MGLP, medium-dose GLP; HGLP, high-dose GLP; Siv, simvastatin; Esr, estrogen receptor; Crat, carnitine O-acetyltransferase; Fads, fatty acid desaturase; Hnf1a, HNF1 homeobox A; Acs15, acyl-CoA synthetase long chain family member 5; Acly, ATP citrate lyase; Cpt1a, carnitine palmitoyltransferase 1A; Apoa2, apolipoprotein A-II; Abcg8, ATP binding cassette subfamily G member 8; Cyp27a1, family 27, subfamily a, polypeptide 1; Gpam, glycerol-3-phosphate acyltransferase, mitochondrial.

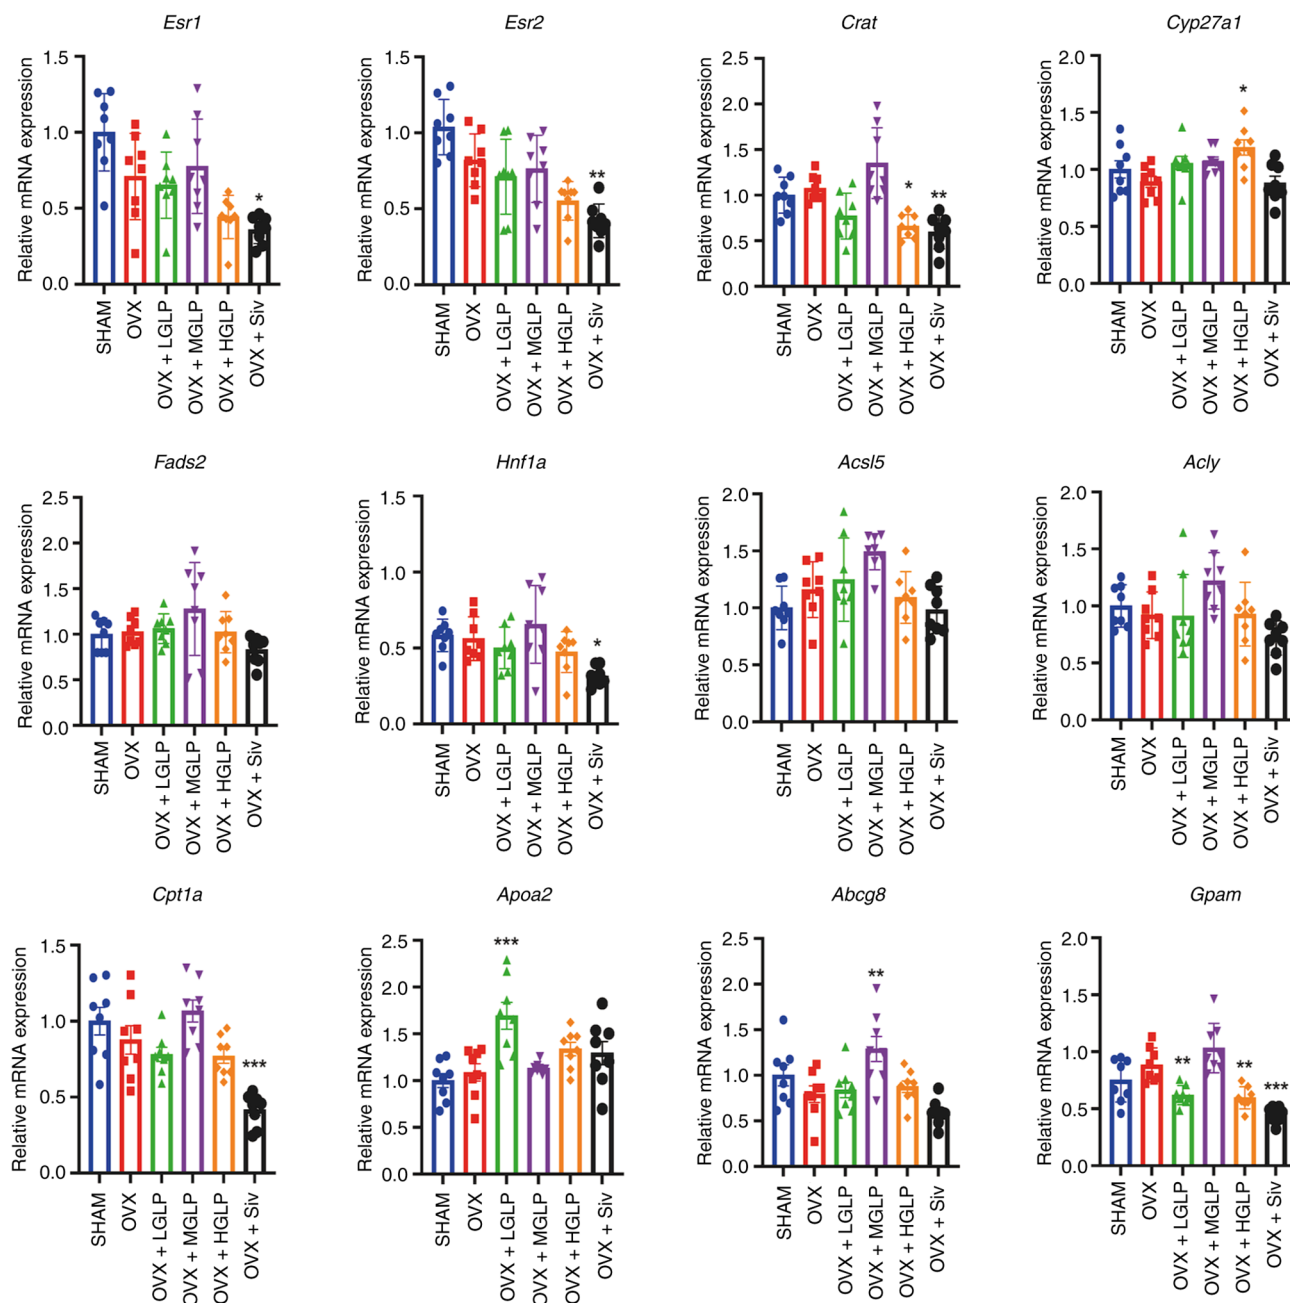

Supplement: Supplementary file 1 [file downloadSupplementary]
